# Supplementary material for: CRISPR mutant rapid identification in B. napus: RNA-Seq functional profiling and breeding technology application
Source: Front Plant Sci. 2025 Apr 22;16:1572020. doi: 10.3389/fpls.2025.1572020 (PMC12052763; doi:10.3389/fpls.2025.1572020)
Supplement: Supplementary Table 1 — Primers. [file Table1.xlsx]

## Sheet: Primers
Primer Name	Forward_Primer	Reverse_Primers
BnaIDA-A07/C06	ATGGCTCCGTGTCGTACG	TCAATGAGGATGAGAGTC
M13-20/26	GTTGTAAAACGACGGCCAG	CAGGAAACAGCTATGAC
BnaActin	TGTTGCTATCCAGGCTGTTCTTTC	GATAGCGTGAGGAAGAGCATAACC
BnaIDA-A07/C06-QPCR	GAGTAGCTCTTCTTATGTGGCC	GGCAAGTAACCAGAAATAAGGC
BnaIDA-DT1-BsF/BsR	ATATATGGTCTCGATTGTACGATGGTTCTGCTCTGTCGTT	ATTATTGGTCTCGAAACCGGTGGCTCCAATTCTTGCACAA
BnaIDA-DT1-F0/R0	TGTACGATGGTTCTGCTCTGTCGTTTTAGAGCTAGAAATAGC	AACCGGTGGCTCCAATTCTTGCACAATCTCTTAGTCGACTCTAC
U626-IDF	TGTCCCAGGATTAGAATGATTAGGC
U629-IDF/IDR	TTAATCCAAACTACTGCAGCCTGAC	AGCCCTCTTCTTTCGATCCATCAAC
Cas9-F/R	TGCAGGAGATTTTCTCCAACGA	AGCCTTCGTAATCTCGGTGTTCA
T2-F	TACGATGGTTCTGCTCTT	/
A2-R	/	ATTCTTCATCTCCACGGT
BnaMAPK6-F/R	CCAGCTTCTGTAATAACAAGGGAAT	TGGTGGGTCAACCAACATCG
BnaBP/KNAT1-F/R	AGCCATCCACAATACTCAAGAA	CGCCGTAATTTTATCAACCACT
BnaKNAT6-F/R	ATGTGACTACTCAGATAAGCCG	GGATACGAAGGATGACAAGCT
BnaHAE-F/R	GCCTTACTATGTGGAAGACGTA	AAAGGTCCACTTTTCTGGTTCT
BnaHSL2-F/R	GGCAATAGATCTCTCCGACTAC	AAGAGTGATGTTGATGAGCGTA
BnaCEL-F/R	CTAATCCCAACGATCTAACCGG	GATAAGCCAAAGCTCCAACAAG
BnaA03T0345300ZS	GGCTTCTCTAAAAGCATACC	AGCGATGGCAACAAGCCC
BnaA07T0106900ZS	GAGAAGCATGATCGAGAGGA	CATCTGGTTTTAAGTACCATCTCG
BnaA03T0510000ZS	ACGACATTGGTTTAAAGAG	CCGCCACATCCTCTTCGTAA
BnaA03T0559300ZS	GCATGCTCTTGATGAACGAAG	GGTCTTCTTCTCCGTTTGTTG
BnaA04T0138500ZS	AACCCTAAACGTCTCATAGA	CATCGATTGAACTCACTT
BnaA04T0155600ZS	CTCACTCAATCGTTTCTCTGCA	GCCTTTCCATGGTATGCA
BnaA02T0142500ZS	GACGAAGCCATGGAGAAGC	ATCTCCGCGAATACTGGATC
BnaA02T0142800ZS	GGGTCCAGAAGTTAGGAG	GACAAAATCATCATAGTT
BnaA02T0145200ZS	GCCACCTCTTTCGCATCTGT	GTATCCCCAACATTCCGT
BnaA02T0151400ZS	CGAGGGCCCGGATTTATCTG	CTTCTTAGATGAAACCGTAACG
BnaA02T0152400ZS	CGGAGTCTCGTGGATATAACT	TTCGGTCTTCACCAAGGC
BnaA03T0046400ZS	TCGTGGTCAGGTGTCAAGTGAT	AACAGTGGTATTCAAAGAATTCC
BnaA03T0174900ZS	ACCGCCACTGCTTCAATGTATT	CTCTGTTTGTATGCCCATGA
